# Supplementary material for: Reducing Delay From Referral to Admission at a U.S. First-Episode Psychosis Service: A Quality Improvement Initiative
Source: Atypon-hosted journal article supplement (doi:10.1176/appi.ps.202100374), 2022-06-02

### The two phases of the QI Model for Improvement at the Program for Specialized Treatment Early in Psychosis (STEP), New Haven (CT).

Left panel: STEP adaptation of the Model: first and second phase.

Right panel: Focus on the second phase: an example of a PDSA cycle.

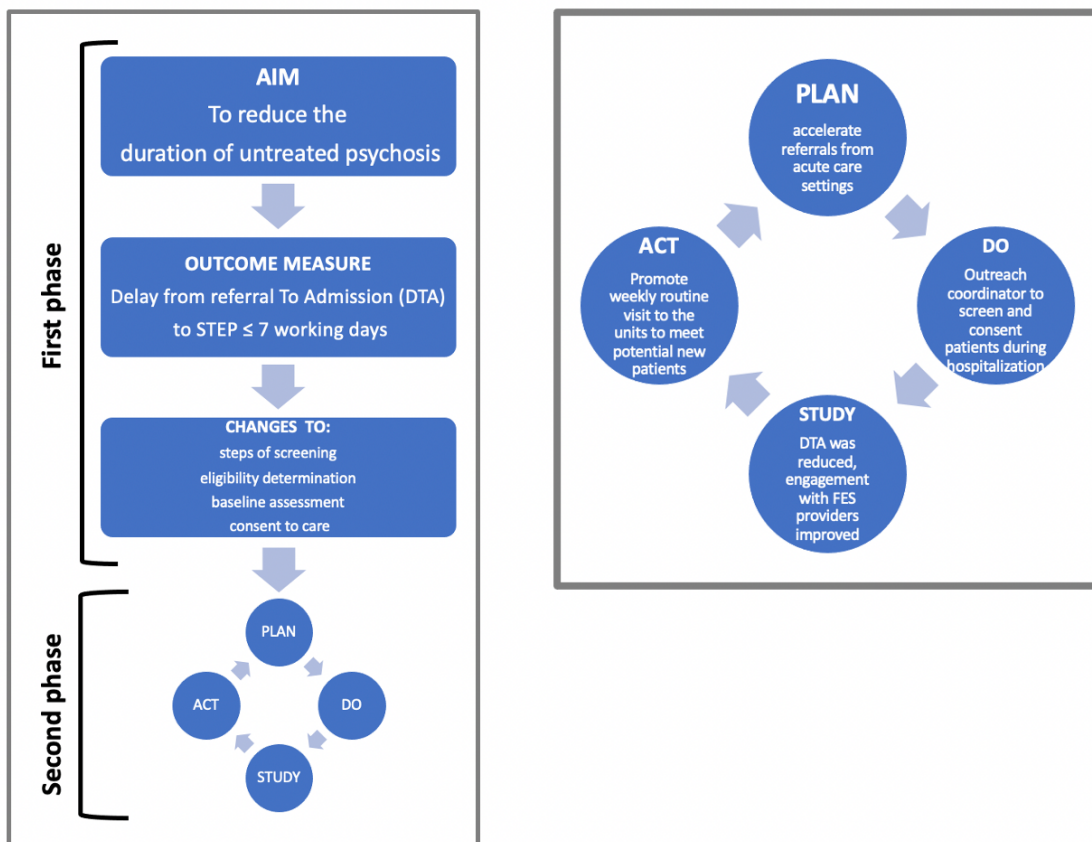

# Run chart of the Quality Improvement informed initiative to reduce the Duration of Untreated Psychosis, at the Specialized Treatment Early in Psychosis Program, New Haven (CT).

The benchmark was set as delay to admission (DTA)  $\leq 7$  days (green dotted line). Over the course of the 4-year QI initiative median DTA fell from 13.5 (red line) to 3 days (pink line).

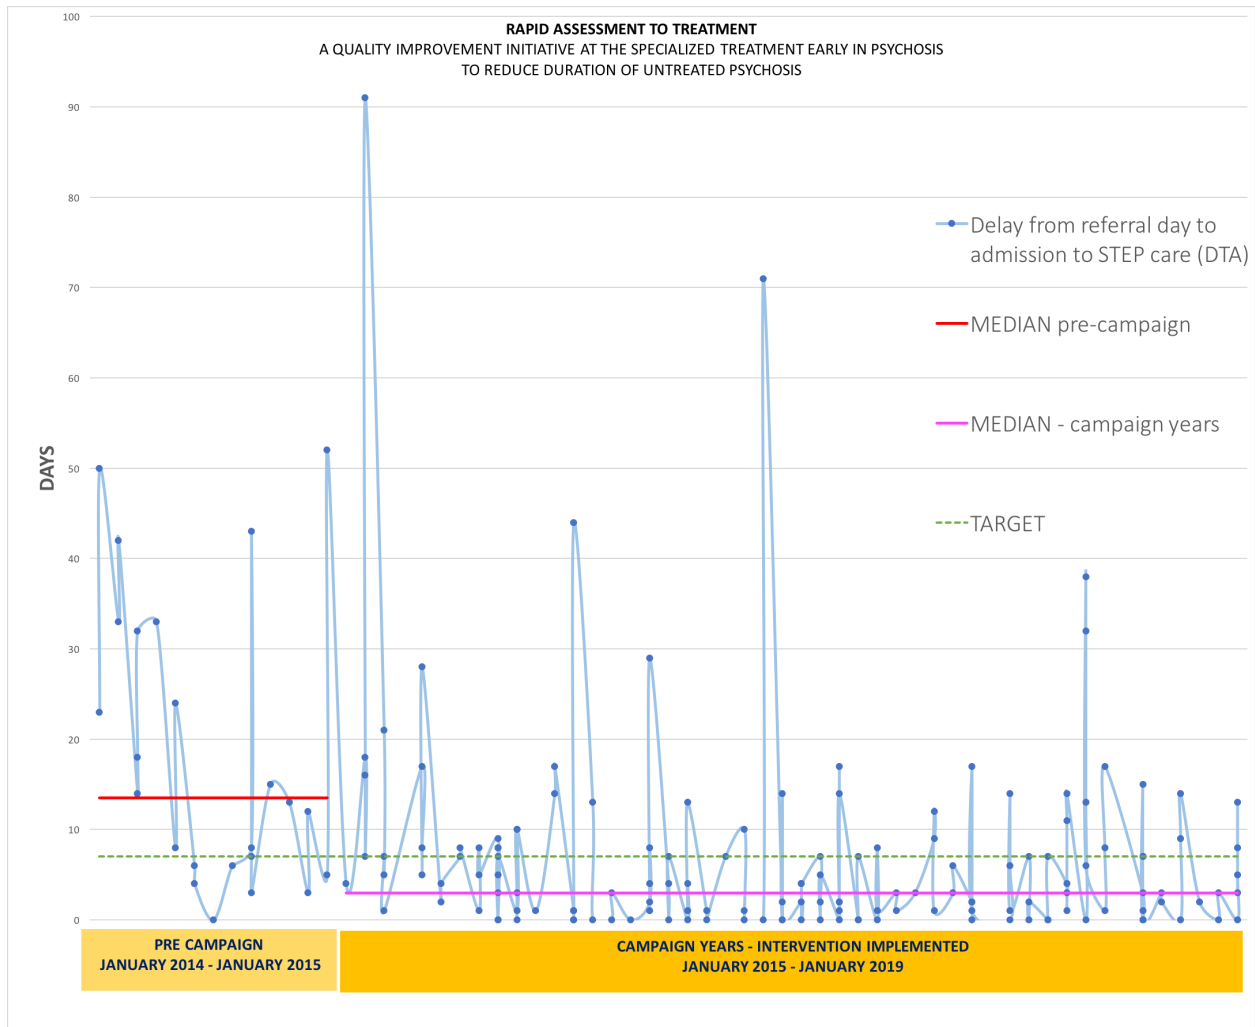

Supplement: appi.ps.202100374.ds001.pdf [file appi.ps.202100374.ds001.pdf]
